# Supplementary material
Source: HighWire-hosted journal article supplement (https://www.jrheum.org/highwire/filestream/42784/field_highwire_adjunct_files/0/220052DataSuppl.pdf)
Supplement: 220052DataSuppl.pdf [file 220052DataSuppl.pdf]

**Supplemental Table S1: Psychiatric Diagnosis Categories by ICD-9 Code**

| <b>Psychiatric Diagnosis</b>                                                                                                                                                                                    | <b>ICD-9 Codes</b>                                                                                                                                                                                                                                                                                                                                |
|-----------------------------------------------------------------------------------------------------------------------------------------------------------------------------------------------------------------|---------------------------------------------------------------------------------------------------------------------------------------------------------------------------------------------------------------------------------------------------------------------------------------------------------------------------------------------------|
| Depression                                                                                                                                                                                                      | <i>296.2, 296.3, 296.82, 298, 300.4, 309.0, 309.1, 311, 313.1</i>                                                                                                                                                                                                                                                                                 |
| Anxiety                                                                                                                                                                                                         | <i>300.00-300.02, 300.09, 300.2, 300.3, 309.21, 309.24, 309.81, 313.0</i>                                                                                                                                                                                                                                                                         |
| Adjustment disorder/ acute stress                                                                                                                                                                               | <i>308, 309.21, 309.22, 309.23, 309.28, 309.29, 309.4, 309.82, 309.83, 309.89, 309.9</i>                                                                                                                                                                                                                                                          |
| Other psychiatric disorders<br>(including schizophrenic, bipolar,<br>psychotic, delusional, dissociative,<br>attention deficit, conduct, tic,<br>autistic, learning, substance-related<br>and eating disorders) | <i>291, 292, 303-305, 295.0-295.9, 296.0, 296.1, 296.4, 296.5, 296.6,<br/>296.7, 296.80, 296.81, 296.89, 297, 298.1, 298.2, 298.3, 298.4, 298.8,<br/>298.9, 299.0, 299.1, 299.8, 299.9, 300.1, 300.5-300.8, 301, 302, 306,<br/>307.1-307.5, 307.8, 309.3, 312, 313.2, 313.3, 313.81-313.83, 313.89,<br/>313.9, 314.0-314.2, 314.8, 314.9, 315</i> |
